# Supplementary material
Source: MDPI journal article supplement (https://www.mdpi.com/2079-9292/11/9/1306)
Supplement: s1 [file s1]

Archive with 9 entries (9 files):
- Supplementary Information.pdf
- Video S1.mp4
- Video S2.mp4
- Video S3.mp4
- Video S4.mp4
- Video S5.mp4
- Video S6.mp4
- Video S7.mp4
- Video S8.mp4
