# Supplementary material
Source: MDPI journal article supplement (https://www.mdpi.com/2079-9292/11/9/1306)
Supplement: s1 [file s1 › Supplementary Information.pdf]

# A Flexible Lightweight Triboelectric Nanogenerator for Protector and Scoring System in Taekwondo Competition Monitoring

Fengxin Sun<sup>1</sup>, Yongsheng Zhu<sup>1</sup>, Changjun Jia<sup>1</sup>, Bowen Ouyang<sup>1</sup>, Tianming Zhao<sup>2</sup>, Caixia Li<sup>1</sup>, Ning Ba<sup>3</sup>, Xinxing Li<sup>4</sup>, Song Chen<sup>1,\*</sup>, Tongtong Che<sup>3,5,\*</sup> and Yupeng Mao<sup>1,\*</sup>

<sup>1</sup> Physical Education Department, Northeastern University, Shenyang 110819, China; 2171435@stu.neu.edu.cn (F.S.); 2001276@stu.neu.edu.cn (Y.Z.); 2071367@stu.neu.edu.cn (C.J.); oybw945@126.com (B.O.); 2101264@stu.neu.edu.cn (C.L.)

<sup>2</sup> College of Sciences, Northeastern University, Shenyang 110819, China; zhaotm@stumail.neu.edu.cn

<sup>3</sup> Department of Sports Science and Physical Education, Tsinghua University, Beijing 100084, China; justbill@mail.tsinghua.edu.cn

<sup>4</sup> Department of Physical Education, Seoul National University, Seoul 08826, Korea; shinsun-lee2021@snu.ac.kr

<sup>5</sup> Capital University of Physical Education and Sport, Beijing 100191, China

\* Correspondence: chensong@pe.neu.edu.cn (S.C.); chetongtong2018@cupes.edu.cn (T.C.); maoyupeng@pe.neu.edu.cn (Y.M.)

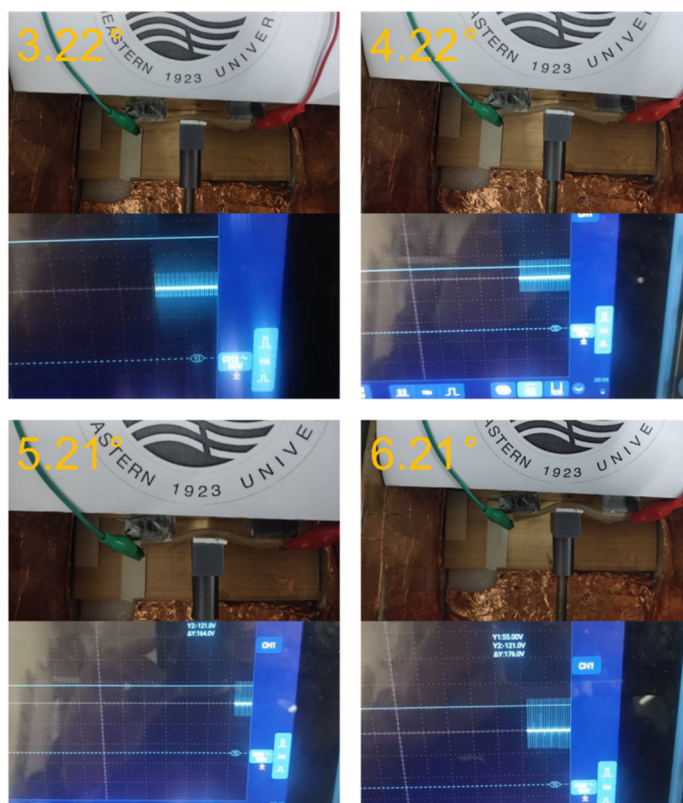

Figure S1. The angle test scenario photographs.

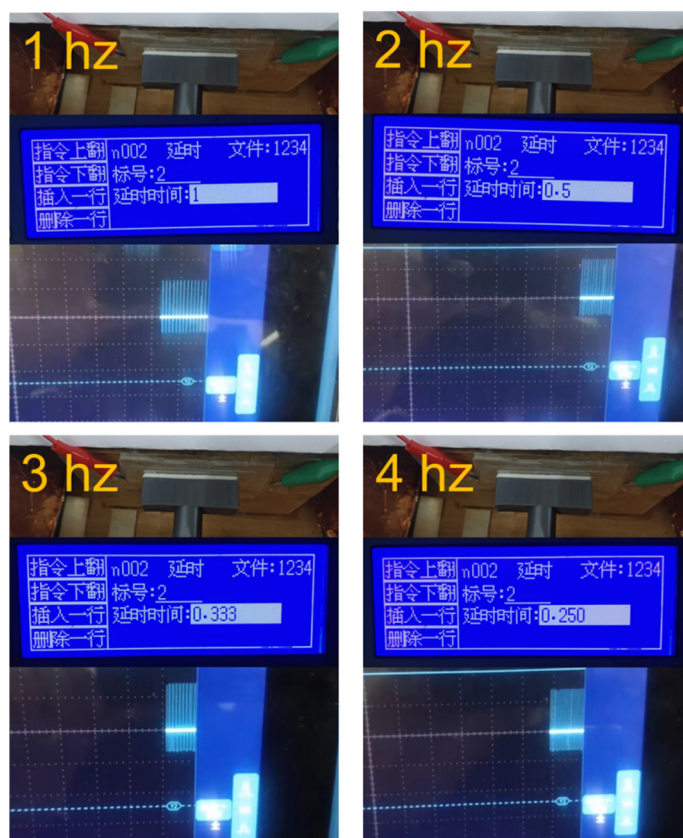

Figure S2. The frequency test scenario photographs.

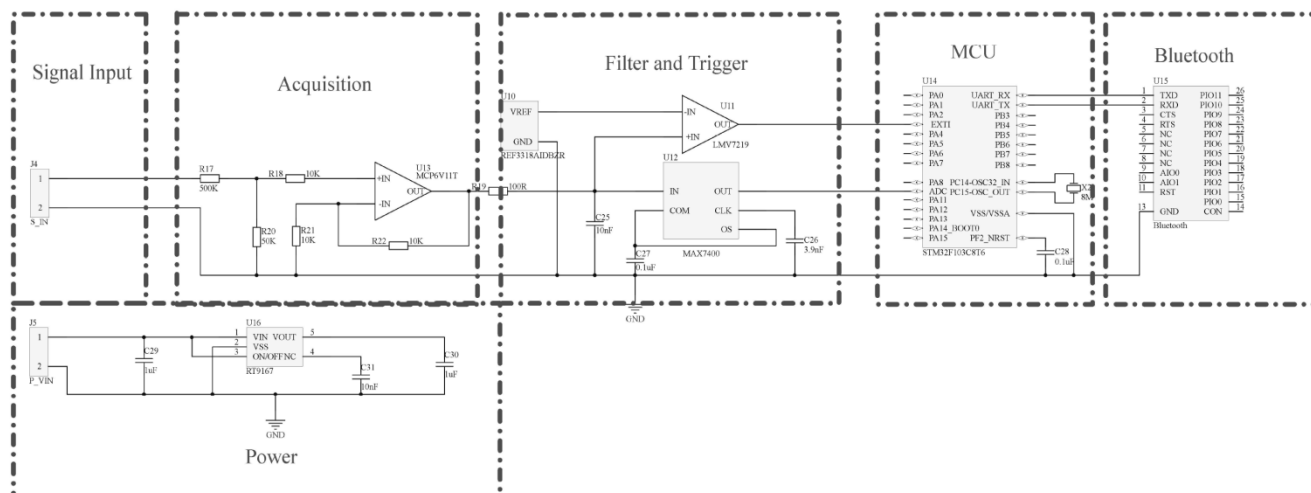

Figure S3: The circuit of unsportsmanlike action monitoring system.

**Supplementary Video S1:** Test of dot LED lamp for hydrogel electrode device and copper electrode device;

**Supplementary Video S2:** Wireless Bluetooth transmission system;

**Supplementary Video S3:** Turning kick test for male athletes;

**Supplementary Video S4:** Turning kick test for female athletes;

**Supplementary Video S5:** Male athlete 360° turning kick test;

**Supplementary Video S6:** Female athlete 360° turning kick test;

**Supplementary Video S7:** Back kick, side kick, and turning kick proficiency test for female athletes;

**Supplementary Video S8:** Test of unsportsmanlike action monitoring system.
